# Supplementary material for: An Association between Diet and MC4R Genetic Polymorphism, in Relation to Obesity and Metabolic Parameters—A Cross Sectional Population-Based Study
Source: MDPI journal article supplement (doi:10.3390/ijms222112044), 2021-11-07
Supplement: s1 [file s1]

Archive with 1 entries (1 files):
- ijms-1433866-supplementary figure 1.pdf
