# Supplementary figures and images for: An Association between Diet and MC4R Genetic Polymorphism, in Relation to Obesity and Metabolic Parameters—A Cross Sectional Population-Based Study
Source: MDPI journal article supplement (doi:10.3390/ijms222112044), 2021-11-07

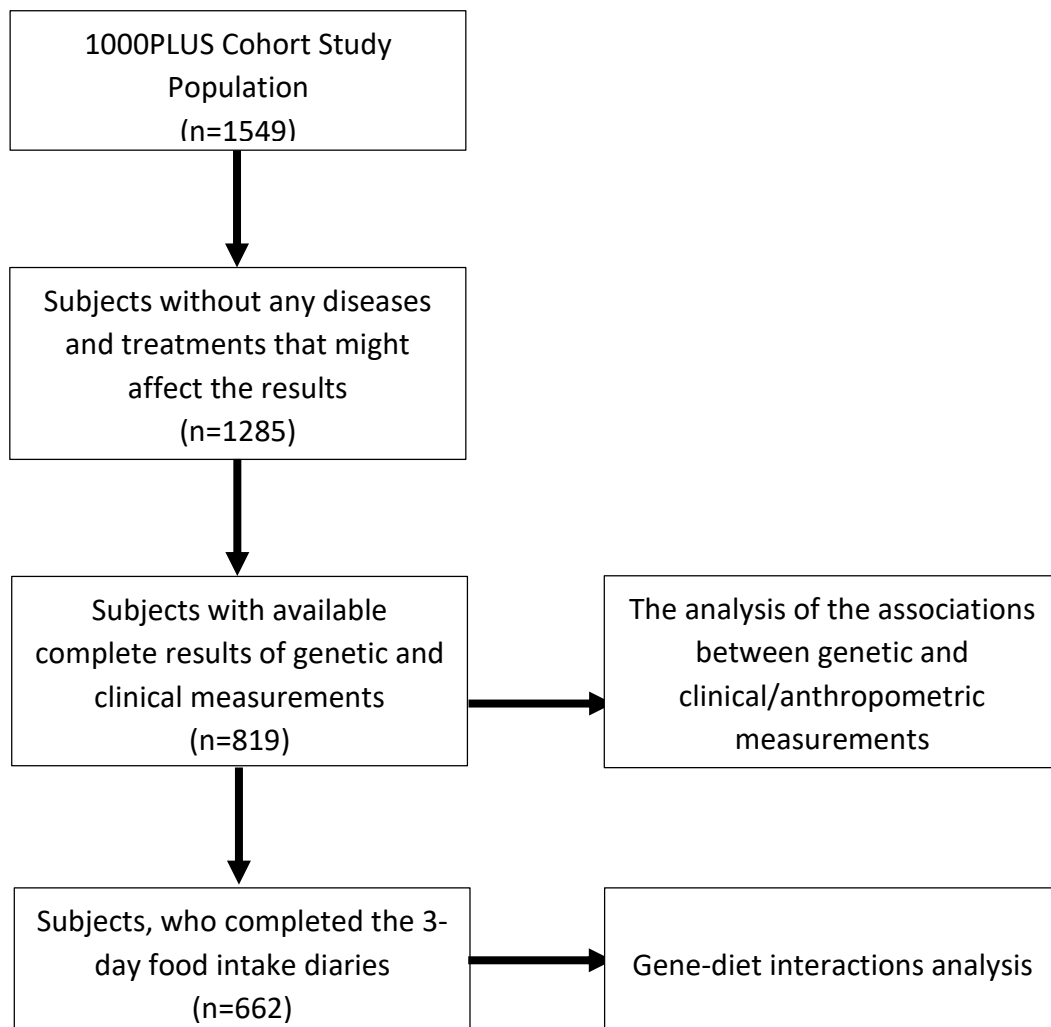

**Figure S1.** The flow-chart diagram of study design.

Supplement: s1 [file s1]
